# Supplementary material
Source: publisher figshare collection journal article supplement (https://acs.figshare.com/ndownloader/files/10635334)
Supplement: Supplementary file 1 [file 10635334]

## **Supporting Information**

### **Celecoxib Induced Self-assembly of Smart Albumin-Doxorubicin Conjugate for Enhanced Cancer Therapy**

*Leilei Shi, Li Xu, Chenwei Wu, Bai Xue, Xin Jin, \* Jiapei Yang, and Xinyuan Zhu*

School of Chemistry and Chemical Engineering, State Key Laboratory of Metal Matrix Composites, Shanghai Jiao Tong University, 800 Dongchuan Road, Shanghai 200240, China

\*Corresponding author: [jxcindy@sjtu.edu.cn](mailto:jxcindy@sjtu.edu.cn)

## Table of Contents

|                    |                                                                                 |     |
|--------------------|---------------------------------------------------------------------------------|-----|
| <b>Figure S1:</b>  | Schematic diagram of synthesis of HSA-GFLG-DOX conjugate.....                   | S5  |
| <b>Figure S2:</b>  | The combination index (CI) plots for different cell lines.....                  | S5  |
| <b>Figure S3:</b>  | The cellular ATP content in A549 cells induced by different drugs .....         | S6  |
| <b>Figure S4:</b>  | The cellular ROS content in A549 cells induced by different drugs.....          | S6  |
| <b>Figure S5:</b>  | Hexokinase activity measurement in A549 cell induced by different drugs .....   | S7  |
| <b>Figure S6:</b>  | Mitochondria membrane potential analysis of A549 cells with JC-1 staining ..... | S7  |
| <b>Figure S7:</b>  | The protein relative expression level in A549 cells .....                       | S8  |
| <b>Figure S8:</b>  | The <sup>1</sup> H-NMR of Fmoc-GFLG-DOX .....                                   | S9  |
| <b>Figure S9:</b>  | Mass spectrum of Fmoc-GFLG-DOX .....                                            | S9  |
| <b>Figure S10:</b> | <sup>1</sup> H-NMR spectrum of GFLG-DOX .....                                   | S10 |
| <b>Figure S11:</b> | Mass spectrum of GFLG-DOX .....                                                 | S10 |
| <b>Figure S12:</b> | UV-Vis spectra of HSA-GFLG-DOX and DOX .....                                    | S11 |
| <b>Figure S13:</b> | Polyacrylamide gel electrophoresis identification.....                          | S11 |

|                                                                                                                 |     |
|-----------------------------------------------------------------------------------------------------------------|-----|
| <b>Figure S14:</b> Fluorescence spectra study of HSA-DC-CPT and HSA-CPT.....                                    | S12 |
| <b>Figure S15:</b> Size stability measurement of HSA and K237-HSA-DC.....                                       | S12 |
| <b>Figure S16:</b> Accumulative drug release from HSA-DC nanoparticles .....                                    | S13 |
| <b>Figure S17:</b> The representative flow cytometry histogram profiles of A549 cells .....                     | S13 |
| <b>Figure S18:</b> The fluorescence microscopy images of A549 cells .....                                       | S14 |
| <b>Figure S19:</b> The expression level of VEGFR-2 and phosphorylation of VEGFR-2 in HUVEC and L929 cells ..... | S14 |
| <b>Figure S20:</b> Representative flow cytometry histogram profiles of HUVEC cells .....                        | S15 |
| <b>Figure S21:</b> Fluorescence microscopy images of HUVEC .....                                                | S15 |
| <b>Figure S22:</b> <i>In vivo</i> imaging.....                                                                  | S16 |
| <b>Figure S23:</b> Tumor inhibition rate.....                                                                   | S16 |
| <b>Figure S24:</b> Standard curves of celecoxib, DOX and K237.....                                              | S17 |
| <b>Table S1:</b> Intracellular metabolites induced by celecoxib, DOX, and drug mixture.....                     | S18 |

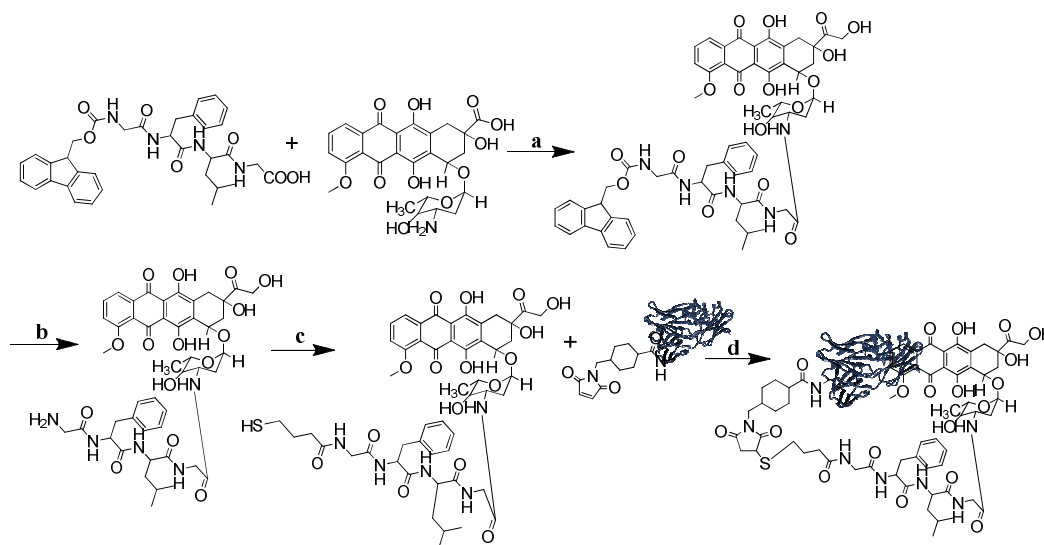

**Figure S1.** Schematic diagram of synthesis of HSA-GFLG-DOX conjugate. (a) EDCI, NHS, DMF, room temperature. (b) Piperidine, DMF, room temperature. (c) Traut's reagent, PBS buffer, DMSO, room temperature. (d) Click reaction at PBS buffer.

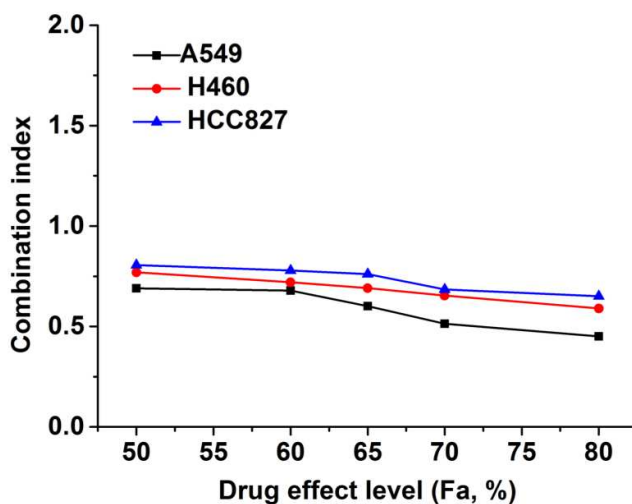

**Figure S2:** The combination index (CI) plots for different A549, H460 and HCC827 cell lines, respectively.

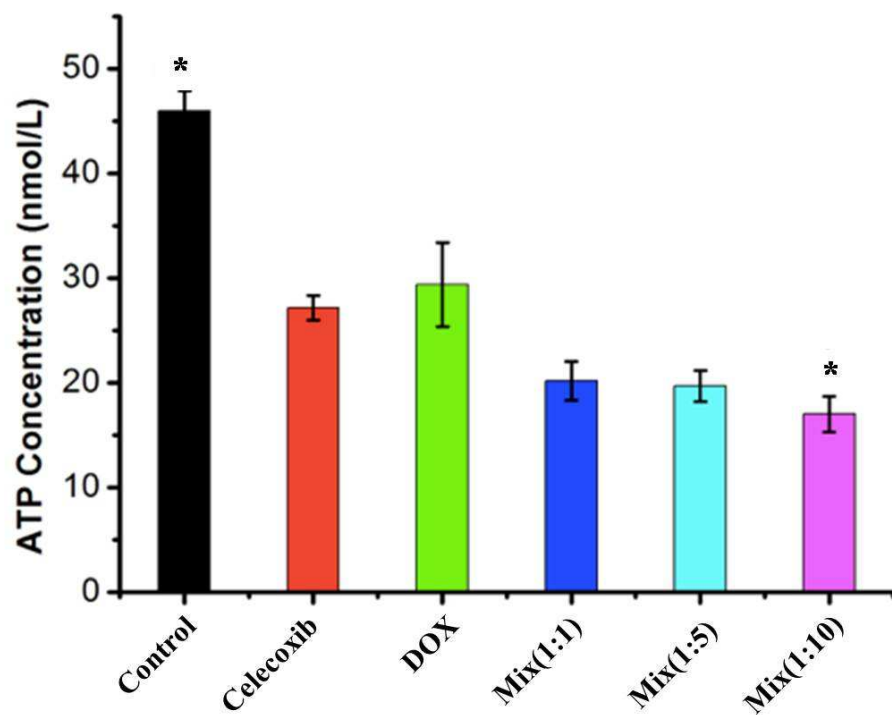

**Figure S3.** The cellular ATP content in A549 cells induced by drug groups and the control group. Data are presented as average  $\pm$  standard error ( $n = 7$ ), and the statistical significance level is  $*p < 0.05$ .

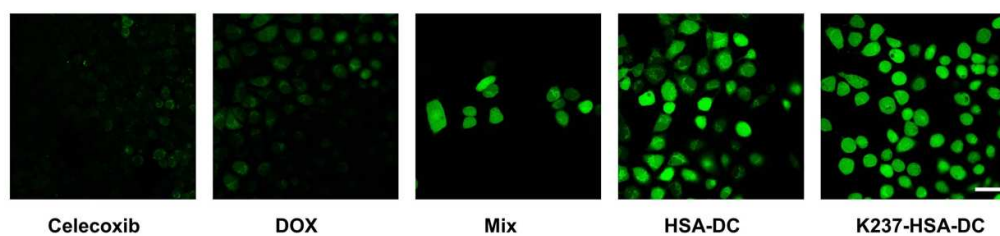

**Figure S4.** The cellular ROS content in A549 cells induced by drug groups and the control group. Upper: Bright field, middle: the green fluorescence of DCFH-DA probe, bottom, the merged image. The scale bar is 25  $\mu\text{m}$ .

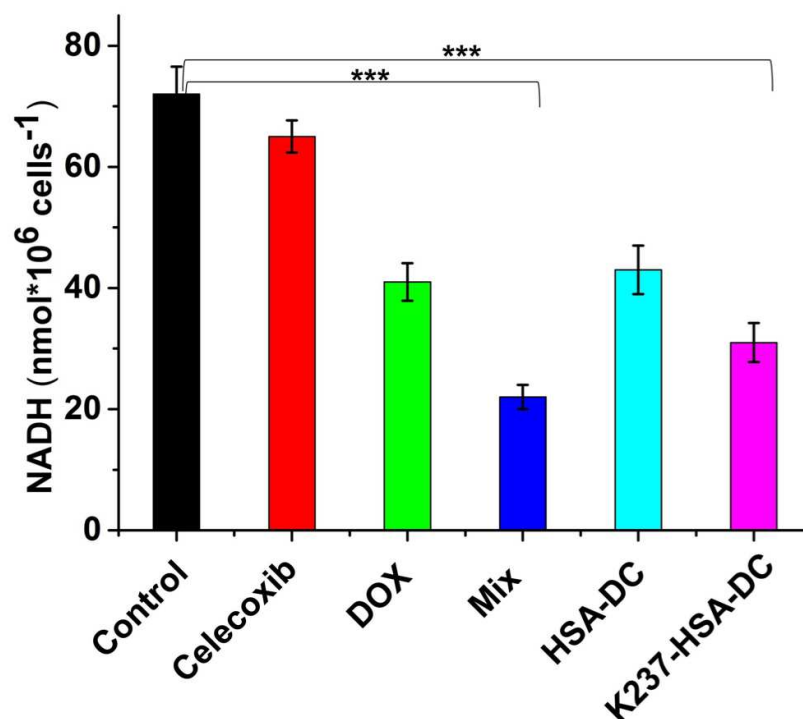

**Figure S5.** Hexokinase activity measurement in A549 cell lysates after cells were treated by different agents.

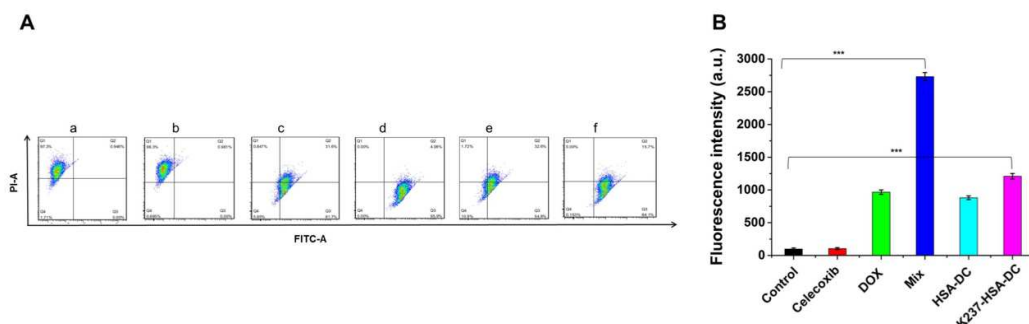

**Figure S6.** Mitochondria membrane potential analysis of A549 cells with JC-1 (Beyotime) staining after cells were treated by different agents. A: The ratio of red fluorescence and green fluorescence in A549 cells analyzed by flow cytometry (a, Control; b, Celecoxib; c, DOX, d, Mix; e, HSA-DC; f, K237-HSA-DC); B: The intensity of green fluorescence in

A549 cells after cells treated by Celecoxib, DOX, Mix, HSA-DC and K237-HSA-DC, respectively.

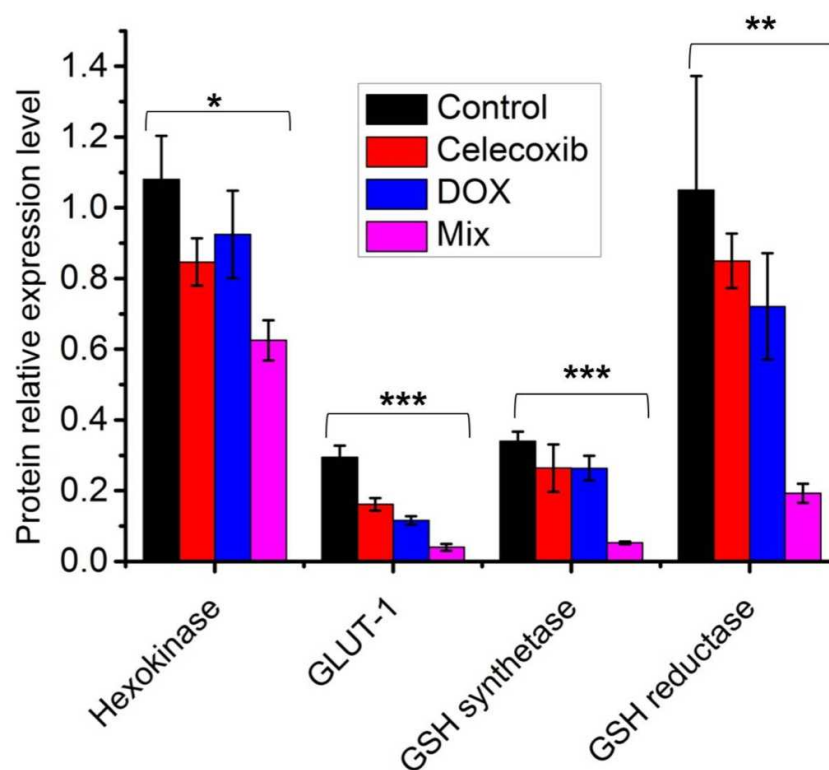

**Figure S7.** The protein relative expression level in A549 cells induced by celecoxib (20  $\mu$ M), DOX (2  $\mu$ M), drug mixture (molar ratio, 1:10) for 24 h. The statistical significance level is \*p<0.05, \*\*p<0.01, \*\*\*p<0.001.

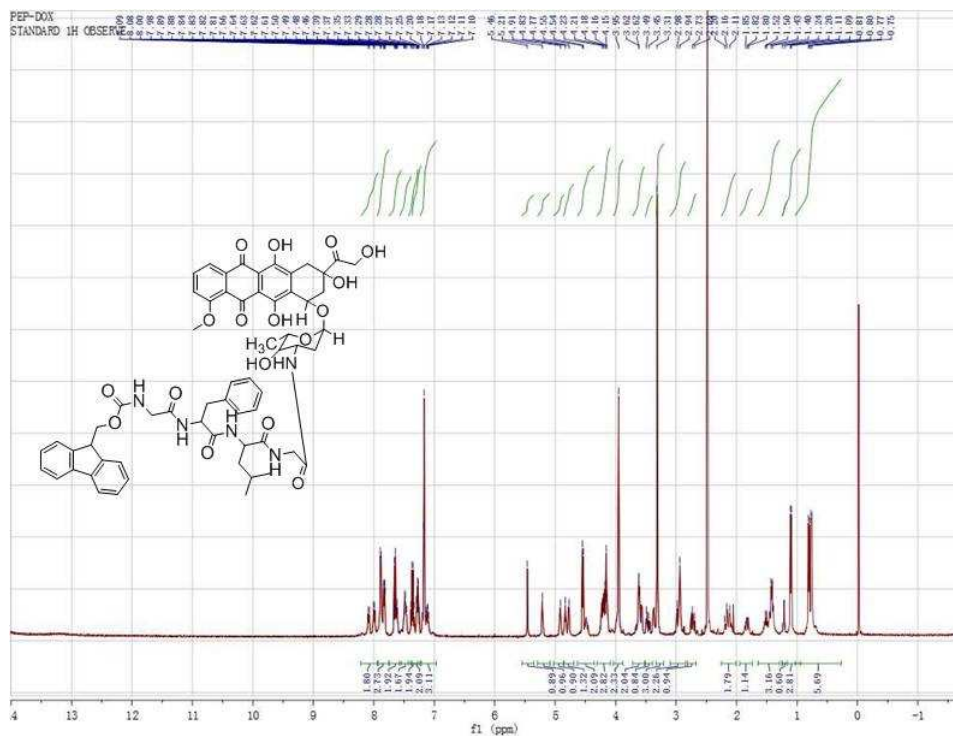

**Figure S8.** The  $^1\text{H}$ -NMR of Fmoc-GFLG-DOX (400 MHz,  $\text{d}_6$ -DMSO).

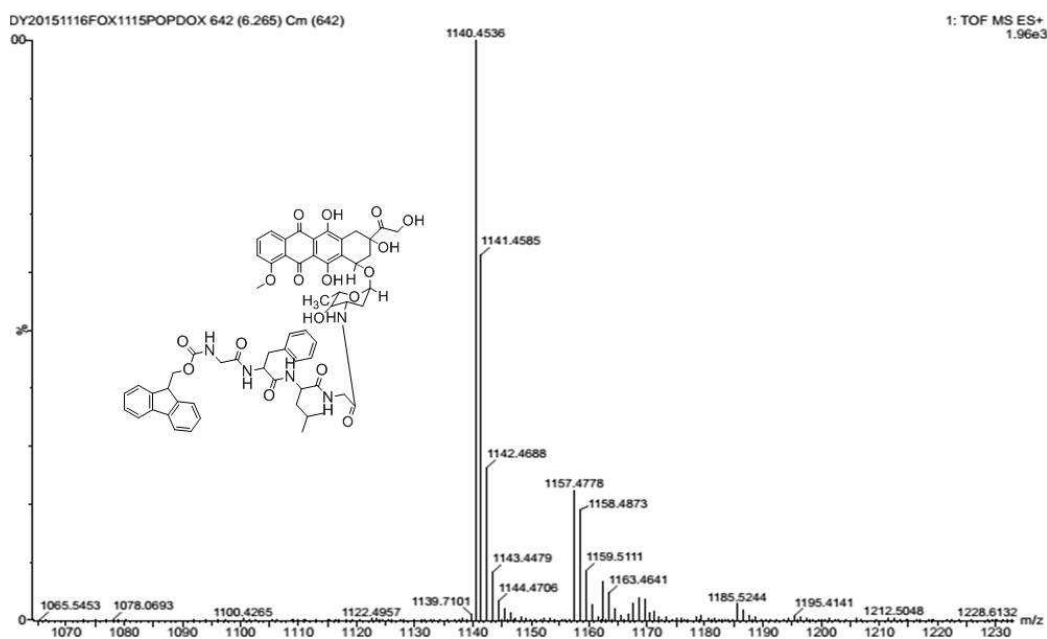

**Figure S9.** Mass spectrum of Fmoc-GFLG-DOX.



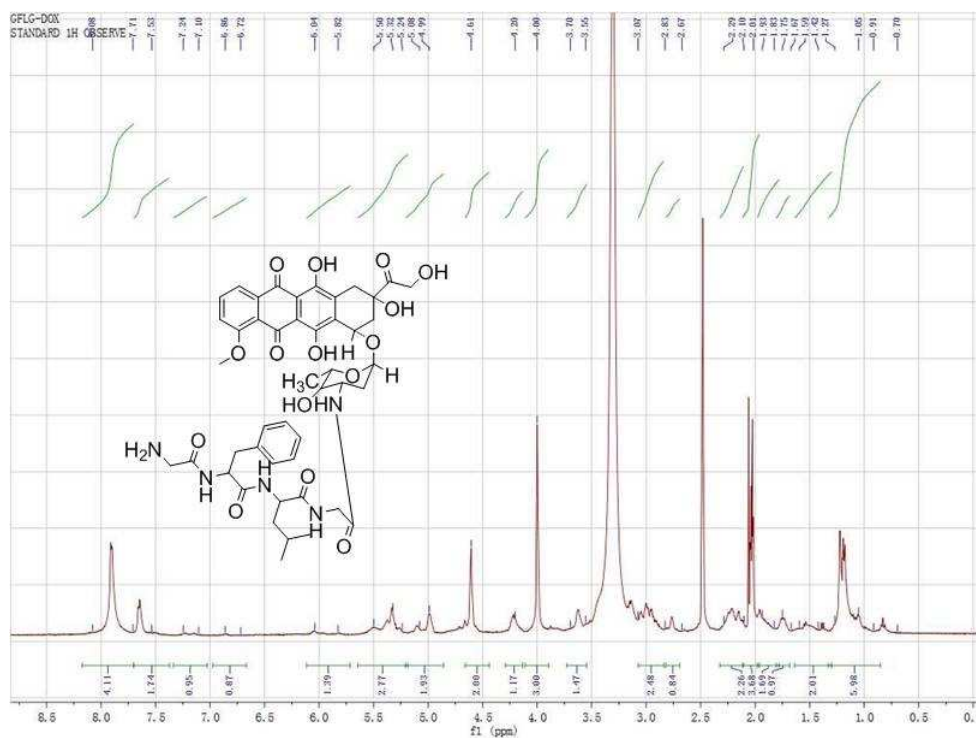

**Figure S10.**  $^1\text{H}$ -NMR spectrum of GFLG-DOX (400 MHz,  $\text{d}_6$ -DMSO).

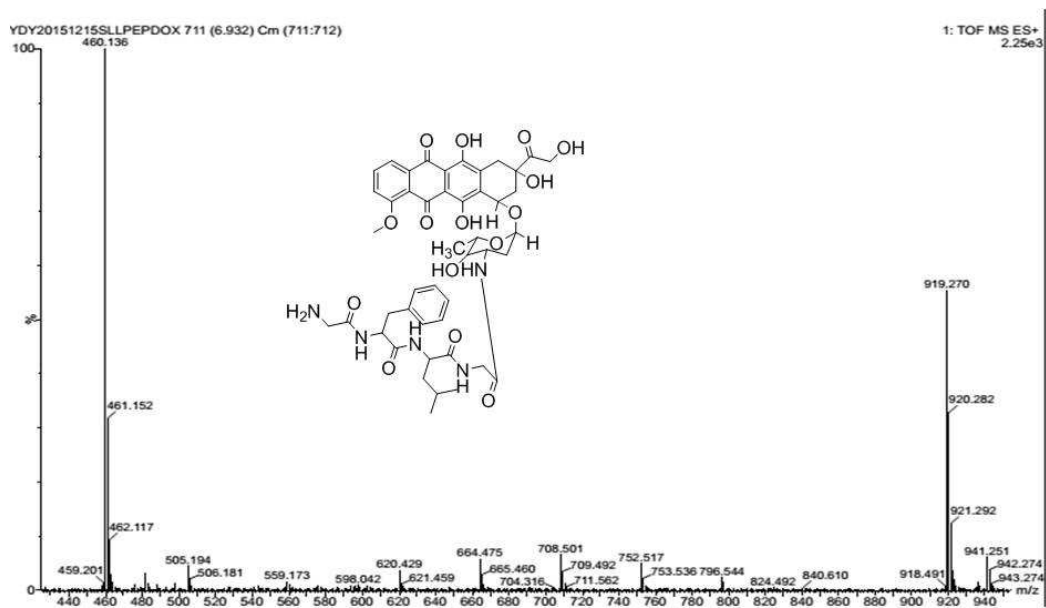

**Figure S11.** Mass spectrum of GFLG-DOX.

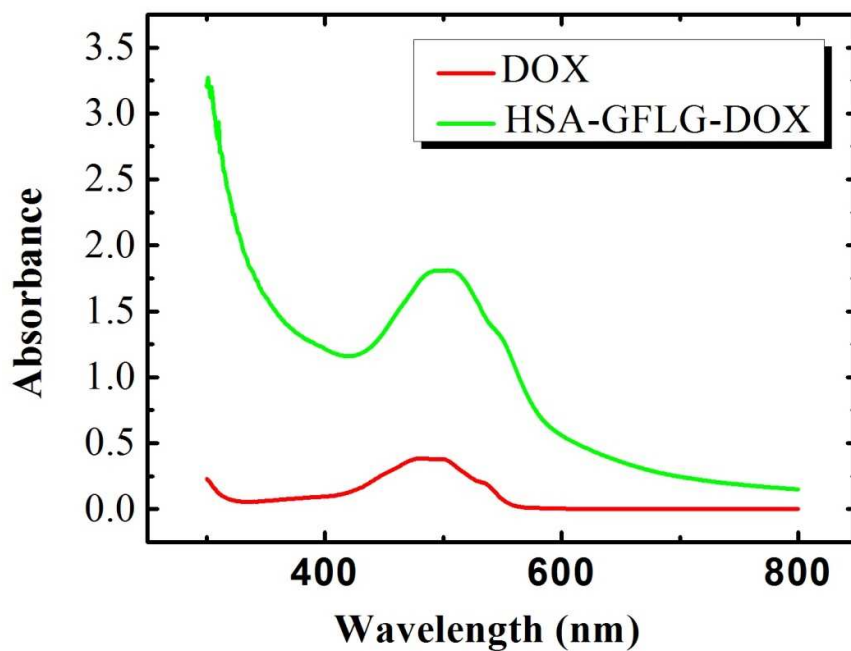

**Figure S12.** UV-Vis spectra of HSA-GFLG-DOX and DOX, HSA-GFLG and DOX.HCl were dispersed in PBS buffer.

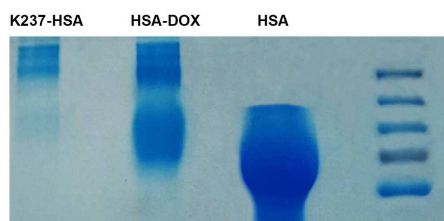

**Figure S13:** Polyacrylamide gel electrophoresis (PAGE) for HSA, HSA-GFLG-DOX, K237-HSA identification.

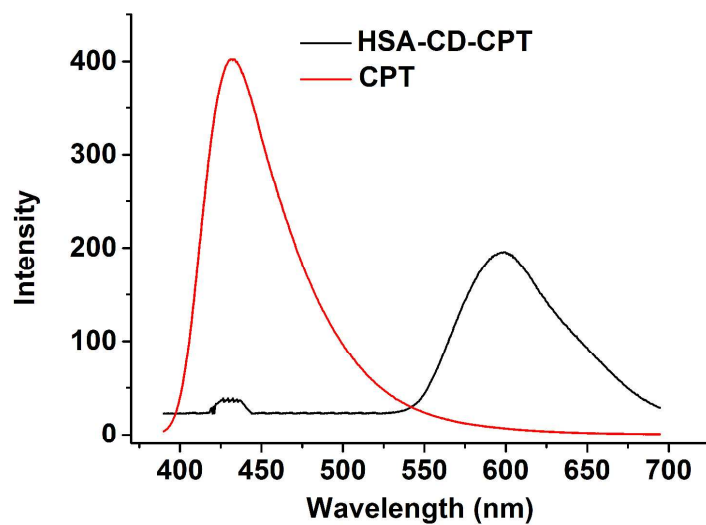

**Figure S14:** Fluorescence intensity study of HSA-CD-CPT and CPT with excitation wavelength 370 nm.

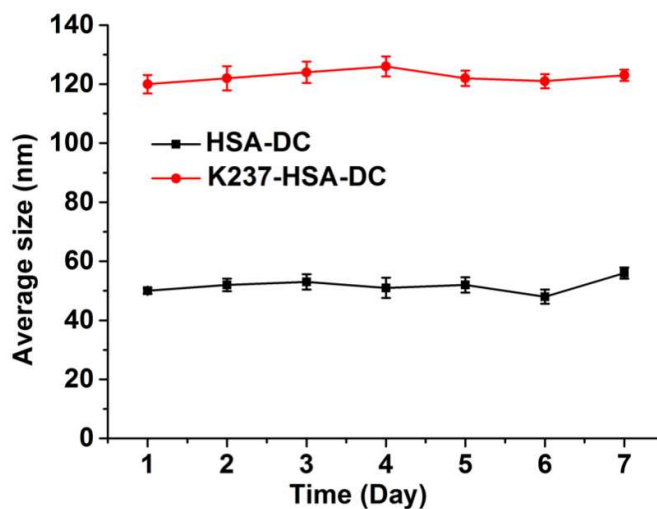

**Figure S15:** Size stability measurement of HSA-DC and K237-HSA-DC for different time points.

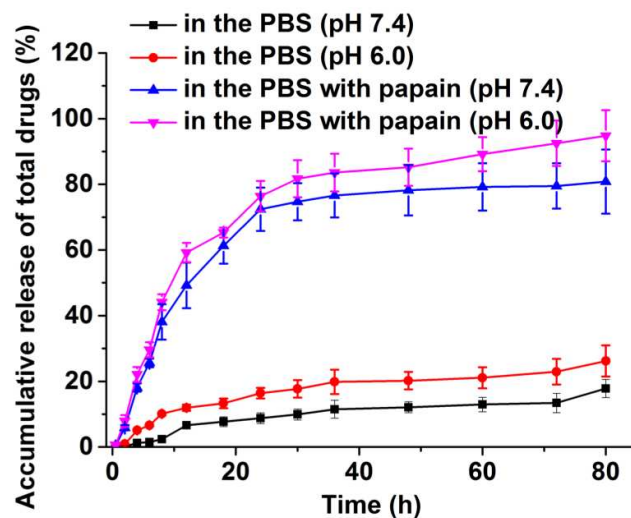

**Figure S16.** Accumulative drug release from HSA-DC nanoparticles in PBS buffer (pH = 7.4 and 6.0) and PBS buffer containing papain (2  $\mu$ M).

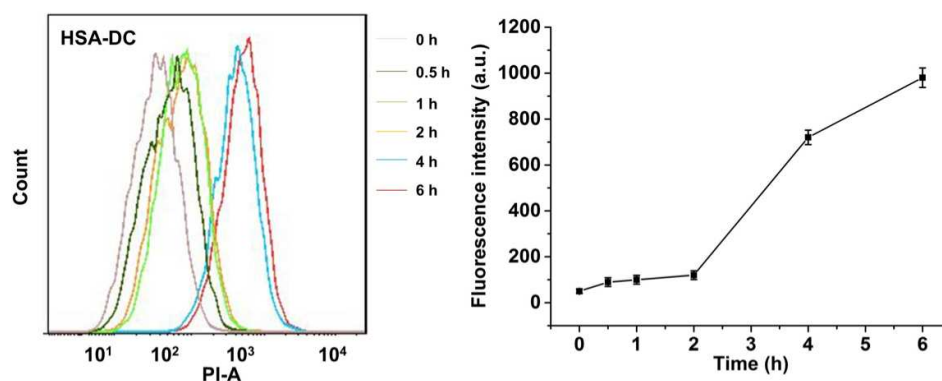

**Figure S17.** Representative flow cytometry histogram profiles of A549 cells cultured with HSA-DC for 0.5 h, 1 h, 2 h, 4 h, 6 h, respectively.

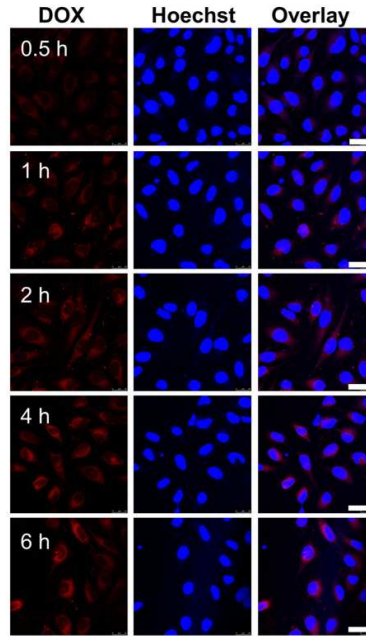

**Figure S18.** Fluorescence microscopy images of A549 cells cultured with HSA-DC for 0.5 h, 1 h, 2 h, 4 h, 6 h, respectively. The blue fluorescence indicates cell nuclei stained by Hoechst. The red fluorescence is fluorescence-emitting DOX. The scale bar is 25  $\mu$ m.

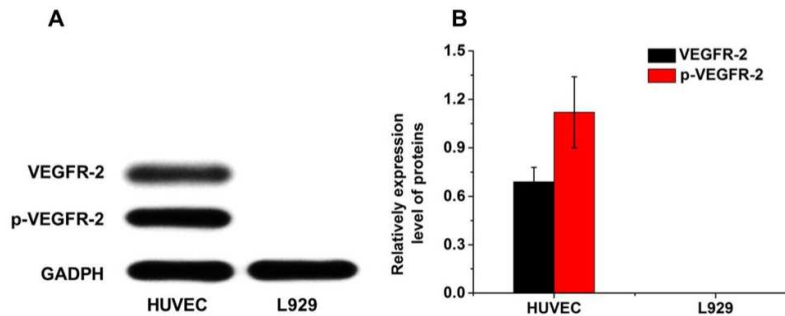

**Figure S19.** The expression level of VEGFR-2 and phosphorylation of VEGFR-2 in HUVEC and L929 cells, respectively. (a) Western blot analysis of VEGFR-2 and p-VEGFR-2 in HUVEC and L929 cells. (b) Quantification of the western blot band densities.

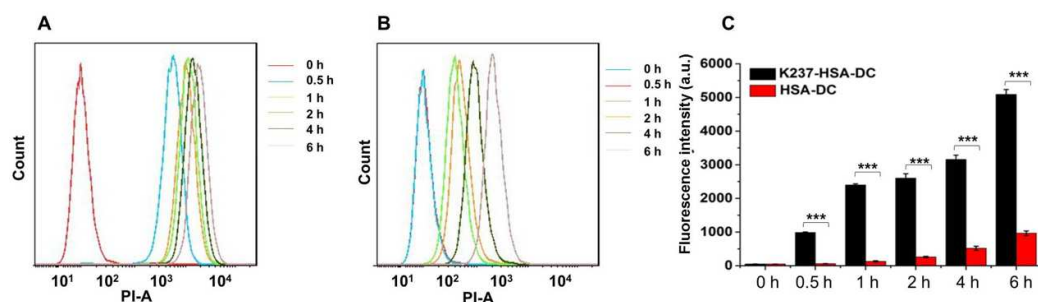

**Figure S20.** Representative flow cytometry histogram profiles of HUVEC cells cultured with HSA-DC and K237- HSA-DC for 0.5 h, 1 h, 2 h, 4 h, 6 h, respectively.

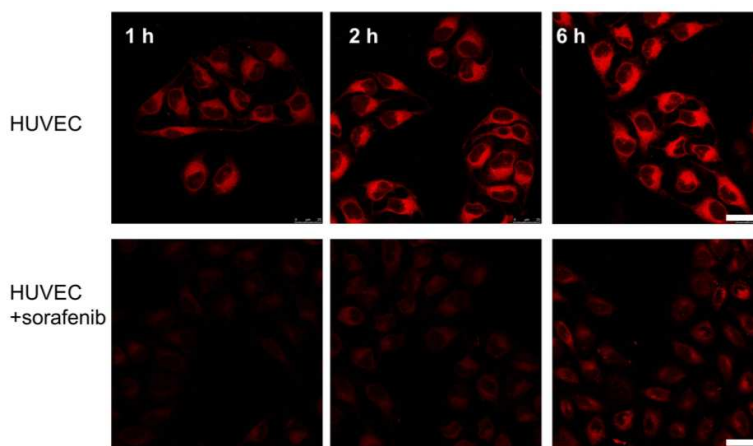

**Figure S21.** Fluorescence microscopy images of HUVEC cultured with K237-HSA-DC. Upper: HUVEC cultured with K237-HSA-DC for 1 h, 2 h and 6 h, respectively. Bottom: HUVEC was firstly incubated with sorafenib (2 μM) for 24 h to inhibit VEGFR-2, then K237-HSA-DC was incubated with HUVEC for 1 h, 2 h and 6 h respectively. The red fluorescence is fluorescence-emitting of DOX. The scale bar is 25 μm.

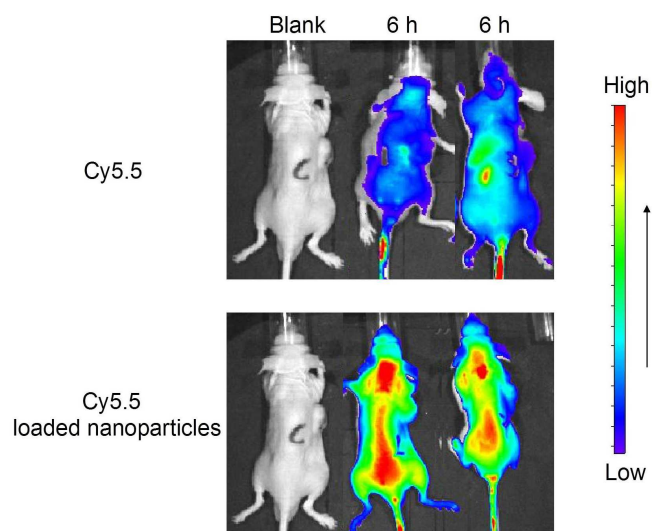

**Figure S22.** In vivo near-infrared images of whole body imaging of A549 tumor-bearing nude mice after intravenous injection of free Cy5.5 and Cy5.5-loaded K237-HSA-DC for 6 h.

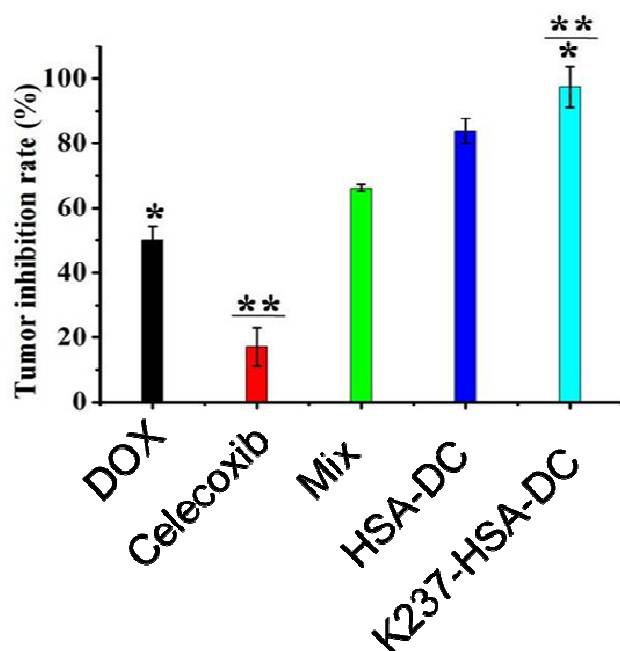

**Figure S23.** Tumor inhibition rate (TIR) is calculated as the following equation:  $TIR (\%) = 100 \times (\text{mean tumor weight of control group} - \text{mean}$

tumor weight of experimental group) / mean tumor weight of control group. Data are represented as average  $\pm$  standard error (n = 7), and the statistical significance level is  $*p<0.05$ ,  $**p<0.01$ ,  $***p<0.001$ .

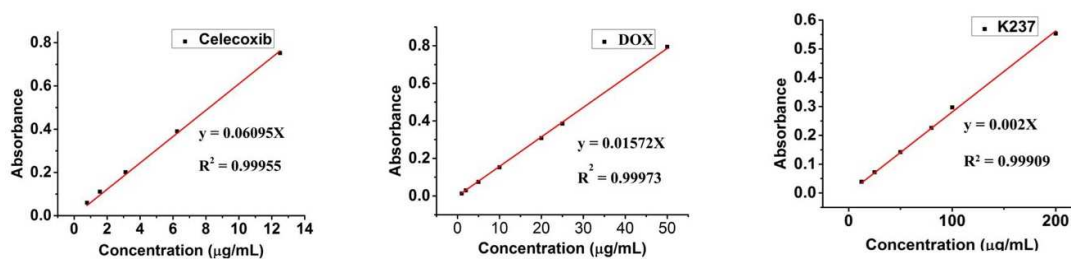

**Figure S24.** Standard curves of celecoxib, DOX and K237, respectively.



**Table S1.** Intracellular metabolites induced by celecoxib, DOX, and drug mixture, respectively. Variable importance in the projection (VIP) was obtained from OPLS with a threshold of 1.0. *p* Value was calculated by student's *t*-test.

| Biomarker (Celecoxib)          | FC       | P        | VIP     | Biomarker (DOX)              | FC       | P        | VIP     | Biomarker (Drug mixture) | FC       | P        | VIP     |
|--------------------------------|----------|----------|---------|------------------------------|----------|----------|---------|--------------------------|----------|----------|---------|
| glutathione                    | 0.039557 | 2.79E-10 | 1.42445 | glutathione                  | 0.051604 | 6.57E-11 | 1.71306 | hypoxanthine             | 0.185977 | 1.48E-10 | 1.46438 |
| aspartic acid                  | 3.68389  | 4.21E-10 | 1.42344 | hypoxanthine                 | 0.314337 | 8.40E-08 | 1.67933 | creatine                 | 5.26554  | 2.56E-07 | 1.42757 |
| phosphate                      | 1.99538  | 9.39E-07 | 1.37609 | N-(3-aminopropyl)-morpholine | 2.59327  | 3.65E-05 | 1.57128 | proline                  | 0.640977 | 5.01E-07 | 1.42066 |
| proline                        | 0.642809 | 1.59E-06 | 1.36934 | proline                      | 1.20736  | 9.55E-05 | 1.53772 | N-Methyl-L-glutamic acid | 2.1329   | 1.96E-06 | 1.40333 |
| Isoleucine                     | 2.52152  | 3.48E-06 | 1.35776 | Isoleucine                   | 2.14095  | 0.000103 | 1.53472 | tyrosine                 | 0.38795  | 2.94E-06 | 1.39718 |
| tyrosine                       | 0.358391 | 4.95E-06 | 1.35193 | phosphate                    | 1.40605  | 0.000308 | 1.48625 | putrescine               | 0.158046 | 6.21E-06 | 1.38436 |
| putrescine                     | 0.139689 | 5.31E-06 | 1.35071 | uracil                       | 1.41398  | 0.000351 | 1.47956 | aspartic acid            | 2.47443  | 8.23E-06 | 1.37899 |
| myo-inositol                   | 3.17896  | 7.75E-06 | 1.34385 | glycine                      | 0.755063 | 0.000556 | 1.45474 | glutathione              | 0.188537 | 2.16E-05 | 1.35799 |
| hypoxanthine                   | 0.334863 | 3.82E-05 | 1.30805 | Pyruvic acid                 | 0.301847 | 0.001062 | 1.41508 | Fluorene                 | 2.68722  | 2.48E-05 | 1.35458 |
| Creatine                       | 24.4885  | 5.16E-05 | 1.29984 | tyrosine                     | 0.698902 | 0.00172  | 1.38145 | myo-inositol             | 1.98159  | 1.31243  | 1.34456 |
| hydroxylamine                  | 2.247    | 0.000152 | 1.26569 | glutamic acid                | 0.697497 | 0.002277 | 1.3601  | cholesterol              | 0.631402 | 0.000145 | 1.3016  |
| fumaric acid                   | 0.215848 | 0.000235 | 1.24934 | lactic acid                  | 0.755111 | 0.002843 | 1.34218 | Isoleucine               | 1.80559  | 1.27724  | 1.2919  |
| L-Malic acid                   | 5.52514  | 0.00028  | 1.24232 | taurine                      | 1.76039  | 0.003166 | 1.33312 | fumaric acid             | 0.249483 | 0.04693  | 1.2817  |
| glycerol                       | 1.87219  | 0.000296 | 1.24    | cholesterol                  | 1.22144  | 0.003193 | 1.3324  | L-cysteine               | 1.8132   | 0.000331 | 1.2687  |
| uracil                         | 2.7233   | 0.000648 | 1.20475 | fumaric acid                 | 0.343343 | 0.003575 | 1.32258 | phosphate                | 1.36277  | 1.25923  | 1.2147  |
| N-acetyl-L-aspartic acid       | 1.53701  | 0.00071  | 1.20025 | nicotinamide                 | 1.50057  | 0.005043 | 1.29118 | oxoproline               | 1.18444  | 1.21914  | 1.2009  |
| Pyruvic acid                   | 0.260113 | 0.000862 | 1.19031 | D-Glyceric acid              | 0.490986 | 0.005752 | 1.27846 | inosine                  | 1.34746  | 1.21708  | 1.1988  |
| guanosine                      | 1.34389  | 0.000864 | 1.19017 | ornithine                    | 0.569355 | 0.005815 | 1.27737 | hydroxylamine            | 1.63312  | 0.001544 | 1.18894 |
| glutamic acid                  | 0.611903 | 0.000877 | 1.18938 | pantothenic acid             | 0.59315  | 0.013758 | 1.18251 | asparagine               | 0.335652 | 0.001775 | 1.18023 |
| glycine                        | 0.745461 | 0.00109  | 1.17765 | asparagine                   | 0.530401 | 0.01706  | 1.15533 | lactic acid              | 0.725706 | 0.001992 | 1.17279 |
| N-(3-aminopropyl)-morpholine 2 | 2.72816  | 0.001191 | 1.17273 | glutamine                    | 2.61984  | 0.027069 | 1.09144 | uracil                   | 1.67062  | 0.002411 | 1.16005 |
| inosine                        | 1.26906  | 0.002722 | 1.12134 | lysine                       | 0.780687 | 0.032922 | 1.06183 | L-Malic acid             | 2.86852  | 0.00427  | 1.11825 |
| ornithine                      | 0.482705 | 0.002828 | 1.1187  | aspartic acid                | 0.796184 | 0.04647  | 1.00547 | ornithine                | 0.550992 | 0.004588 | 1.11257 |
| serine                         | 1.30477  | 0.002987 | 1.11491 | hypoxanthine                 | 0.314337 | 8.40E-08 | 1.67933 | glycerol                 | 1.31681  | 0.004732 | 1.1101  |
| asparagine                     | 0.410146 | 0.00463  | 1.08257 | N-(3-aminopropyl)-morpholine | 2.59327  | 3.65E-05 | 1.57128 | phenylalanine            | 0.702041 | 0.005678 | 1.09513 |
| taurine                        | 1.76912  | 0.006088 | 1.06056 | L-Malic acid                 | 1.850    | 0.0076   | 1.0041  | glutamine 3              | 3.21689  | 0.006198 | 1.0877  |
| glutamine                      | 3.87715  | 0.006101 | 1.06039 |                              |          |          |         | Pyruvic acid             | 0.532504 | 0.010849 | 1.03615 |
| lactic acid                    | 0.735826 | 0.00733  | 1.04476 |                              |          |          |         |                          |          |          |         |
